# Supplementary material for: Channels formation through photodimerization of guest molecules within solid inclusion compounds
Source: Royal Society of Chemistry journal article supplement (doi:10.1039/b615032b), 2007-01-01
Supplement: b615032b.pdf [file b615032b.pdf]

| HEADER CSD ENTRY hp1r4 |          |          |          |       |        |          |        |        |           |
|------------------------|----------|----------|----------|-------|--------|----------|--------|--------|-----------|
| CRYST1                 | 10.8640  | 11.5360  | 16.3200  | 95.13 | 108.38 | 112.18   |        |        | P-1       |
| SCALE1                 | 0.092047 | 0.037519 | 0.040630 |       |        | 0.000000 |        |        |           |
| SCALE2                 | 0.000000 | 0.093610 | 0.022846 |       |        | 0.000000 |        |        |           |
| SCALE3                 | 0.000000 | 0.000000 | 0.066462 |       |        | 0.000000 |        |        |           |
| HETATM                 | 1        | O1A      | UNK      | 0     | 1      | 3.586    | -0.251 | 6.344  | 1.00 0.00 |
| HETATM                 | 2        | C1A      | UNK      | 0     | 1      | 5.736    | 1.261  | 4.302  | 1.00 0.00 |
| HETATM                 | 3        | C2A      | UNK      | 0     | 1      | 5.466    | 0.651  | 5.271  | 1.00 0.00 |
| HETATM                 | 4        | C3A      | UNK      | 0     | 1      | 5.010    | -0.105 | 6.434  | 1.00 0.00 |
| HETATM                 | 5        | C4A      | UNK      | 0     | 1      | 5.600    | -1.503 | 6.393  | 1.00 0.00 |
| HETATM                 | 6        | C5A      | UNK      | 0     | 1      | 4.805    | -2.594 | 6.610  | 1.00 0.00 |
| HETATM                 | 7        | H5A      | UNK      | 0     | 1      | 3.893    | -2.486 | 6.756  | 1.00 0.00 |
| HETATM                 | 8        | C6A      | UNK      | 0     | 1      | 5.372    | -3.874 | 6.608  | 1.00 0.00 |
| HETATM                 | 9        | H6A      | UNK      | 0     | 1      | 4.838    | -4.615 | 6.781  | 1.00 0.00 |
| HETATM                 | 10       | C7A      | UNK      | 0     | 1      | 6.689    | -4.044 | 6.357  | 1.00 0.00 |
| HETATM                 | 11       | H7A      | UNK      | 0     | 1      | 7.050    | -4.901 | 6.330  | 1.00 0.00 |
| HETATM                 | 12       | C8A      | UNK      | 0     | 1      | 7.492    | -2.964 | 6.145  | 1.00 0.00 |
| HETATM                 | 13       | H8A      | UNK      | 0     | 1      | 8.401    | -3.078 | 5.981  | 1.00 0.00 |
| HETATM                 | 14       | C9A      | UNK      | 0     | 1      | 6.941    | -1.697 | 6.173  | 1.00 0.00 |
| HETATM                 | 15       | H9A      | UNK      | 0     | 1      | 7.491    | -0.959 | 6.043  | 1.00 0.00 |
| HETATM                 | 16       | C10A     | UNK      | 0     | 1      | 5.391    | 0.569  | 7.731  | 1.00 0.00 |
| HETATM                 | 17       | C11A     | UNK      | 0     | 1      | 4.863    | 0.084  | 8.907  | 1.00 0.00 |
| HETATM                 | 18       | H11A     | UNK      | 0     | 1      | 4.263    | -0.626 | 8.895  | 1.00 0.00 |
| HETATM                 | 19       | C12A     | UNK      | 0     | 1      | 5.232    | 0.669  | 10.117 | 1.00 0.00 |
| HETATM                 | 20       | H12A     | UNK      | 0     | 1      | 4.873    | 0.353  | 10.915 | 1.00 0.00 |
| HETATM                 | 21       | C13A     | UNK      | 0     | 1      | 6.120    | 1.703  | 10.137 | 1.00 0.00 |
| HETATM                 | 22       | H13A     | UNK      | 0     | 1      | 6.374    | 2.074  | 10.951 | 1.00 0.00 |
| HETATM                 | 23       | C14A     | UNK      | 0     | 1      | 6.637    | 2.199  | 8.992  | 1.00 0.00 |
| HETATM                 | 24       | H14A     | UNK      | 0     | 1      | 7.230    | 2.915  | 9.013  | 1.00 0.00 |
| HETATM                 | 25       | C15A     | UNK      | 0     | 1      | 6.265    | 1.617  | 7.776  | 1.00 0.00 |
| HETATM                 | 26       | H15A     | UNK      | 0     | 1      | 6.618    | 1.950  | 6.983  | 1.00 0.00 |
| HETATM                 | 27       | O1B      | UNK      | 0     | 1      | 7.939    | 3.289  | 0.587  | 1.00 0.00 |
| HETATM                 | 28       | C1B      | UNK      | 0     | 1      | 6.028    | 1.957  | 3.131  | 1.00 0.00 |
| HETATM                 | 29       | C2B      | UNK      | 0     | 1      | 6.252    | 2.525  | 2.117  | 1.00 0.00 |
| HETATM                 | 30       | C3B      | UNK      | 0     | 1      | 6.534    | 3.276  | 0.867  | 1.00 0.00 |
| HETATM                 | 31       | C4B      | UNK      | 0     | 1      | 6.119    | 4.728  | 1.049  | 1.00 0.00 |
| HETATM                 | 32       | C5B      | UNK      | 0     | 1      | 7.021    | 5.761  | 1.046  | 1.00 0.00 |
| HETATM                 | 33       | H5B      | UNK      | 0     | 1      | 7.923    | 5.585  | 0.909  | 1.00 0.00 |
| HETATM                 | 34       | C6B      | UNK      | 0     | 1      | 6.596    | 7.067  | 1.246  | 1.00 0.00 |
| HETATM                 | 35       | H6B      | UNK      | 0     | 1      | 7.220    | 7.756  | 1.223  | 1.00 0.00 |
| HETATM                 | 36       | C7B      | UNK      | 0     | 1      | 5.286    | 7.361  | 1.473  | 1.00 0.00 |
| HETATM                 | 37       | H7B      | UNK      | 0     | 1      | 5.019    | 8.240  | 1.619  | 1.00 0.00 |
| HETATM                 | 38       | C8B      | UNK      | 0     | 1      | 4.372    | 6.345  | 1.482  | 1.00 0.00 |
| HETATM                 | 39       | H8B      | UNK      | 0     | 1      | 3.474    | 6.531  | 1.634  | 1.00 0.00 |
| HETATM                 | 40       | C9B      | UNK      | 0     | 1      | 4.780    | 5.041  | 1.265  | 1.00 0.00 |
| HETATM                 | 41       | H9B      | UNK      | 0     | 1      | 4.146    | 4.360  | 1.264  | 1.00 0.00 |
| HETATM                 | 42       | C10B     | UNK      | 0     | 1      | 5.793    | 2.687  | -0.355 | 1.00 0.00 |
| HETATM                 | 43       | C11B     | UNK      | 0     | 1      | 6.030    | 3.197  | -1.611 | 1.00 0.00 |
| HETATM                 | 44       | H11B     | UNK      | 0     | 1      | 6.652    | 3.880  | -1.717 | 1.00 0.00 |
| HETATM                 | 45       | C12B     | UNK      | 0     | 1      | 5.347    | 2.707  | -2.732 | 1.00 0.00 |
| HETATM                 | 46       | H12B     | UNK      | 0     | 1      | 5.512    | 3.059  | -3.576 | 1.00 0.00 |
| HETATM                 | 47       | C13B     | UNK      | 0     | 1      | 4.436    | 1.701  | -2.564 | 1.00 0.00 |
| HETATM                 | 48       | H13B     | UNK      | 0     | 1      | 3.977    | 1.375  | -3.304 | 1.00 0.00 |
| HETATM                 | 49       | C14B     | UNK      | 0     | 1      | 4.186    | 1.170  | -1.341 | 1.00 0.00 |
| HETATM                 | 50       | H14B     | UNK      | 0     | 1      | 3.564    | 0.485  | -1.247 | 1.00 0.00 |
| HETATM                 | 51       | C15B     | UNK      | 0     | 1      | 4.872    | 1.661  | -0.214 | 1.00 0.00 |
| HETATM                 | 52       | H15B     | UNK      | 0     | 1      | 4.707    | 1.297  | 0.626  | 1.00 0.00 |
| HETATM                 | 53       | H10A     | UNK      | 0     | 1      | 3.321    | 0.452  | 6.334  | 1.00 0.00 |
| HETATM                 | 54       | H10B     | UNK      | 0     | 1      | 8.254    | 2.512  | 0.737  | 1.00 0.00 |
| HETATM                 | 55       | C16A     | UNK      | 0     | 1      | -0.651   | 0.909  | 1.830  | 1.00 0.00 |
| HETATM                 | 56       | C17A     | UNK      | 0     | 1      | -1.063   | 1.514  | 3.163  | 1.00 0.00 |
| HETATM                 | 57       | H17A     | UNK      | 0     | 1      | -2.030   | 1.666  | 3.143  | 1.00 0.00 |
| HETATM                 | 58       | C18A     | UNK      | 0     | 1      | -0.763   | 0.530  | 4.257  | 1.00 0.00 |
| HETATM                 | 59       | H18A     | UNK      | 0     | 1      | -1.380   | 0.361  | 4.932  | 1.00 0.00 |
| HETATM                 | 60       | C19A     | UNK      | 0     | 1      | 0.380    | -0.077 | 4.233  | 1.00 0.00 |

|        |    |      |     |   |   |        |        |       |      |      |
|--------|----|------|-----|---|---|--------|--------|-------|------|------|
| HETATM | 61 | H19A | UNK | 0 | 1 | 0.615  | -0.678 | 4.902 | 1.00 | 0.00 |
| HETATM | 62 | C20A | UNK | 0 | 1 | 1.320  | 0.210  | 3.101 | 1.00 | 0.00 |
| HETATM | 63 | C21A | UNK | 0 | 1 | 2.405  | -0.866 | 2.916 | 1.00 | 0.00 |
| HETATM | 64 | H21A | UNK | 0 | 1 | 2.969  | -0.628 | 2.177 | 1.00 | 0.00 |
| HETATM | 65 | H21B | UNK | 0 | 1 | 1.989  | -1.713 | 2.741 | 1.00 | 0.00 |
| HETATM | 66 | H21C | UNK | 0 | 1 | 2.934  | -0.928 | 3.715 | 1.00 | 0.00 |
| HETATM | 67 | O2A  | UNK | 0 | 1 | -1.347 | 0.972  | 0.803 | 1.00 | 0.00 |
| HETATM | 68 | N1A  | UNK | 0 | 1 | 0.514  | 0.251  | 1.870 | 1.00 | 0.00 |
| HETATM | 69 | H1NA | UNK | 0 | 1 | 0.796  | -0.155 | 1.166 | 1.00 | 0.00 |
| HETATM | 70 | O2B  | UNK | 0 | 1 | 2.315  | 2.119  | 5.687 | 1.00 | 0.00 |
| HETATM | 71 | N1B  | UNK | 0 | 1 | 0.474  | 2.899  | 4.630 | 1.00 | 0.00 |
| HETATM | 72 | H1NB | UNK | 0 | 1 | 0.205  | 3.321  | 5.329 | 1.00 | 0.00 |
| HETATM | 73 | C16B | UNK | 0 | 1 | 1.619  | 2.229  | 4.673 | 1.00 | 0.00 |
| HETATM | 74 | C17B | UNK | 0 | 1 | 2.058  | 1.624  | 3.351 | 1.00 | 0.00 |
| HETATM | 75 | H17B | UNK | 0 | 1 | 3.027  | 1.475  | 3.378 | 1.00 | 0.00 |
| HETATM | 76 | C18B | UNK | 0 | 1 | 1.752  | 2.596  | 2.266 | 1.00 | 0.00 |
| HETATM | 77 | H18B | UNK | 0 | 1 | 2.365  | 2.762  | 1.587 | 1.00 | 0.00 |
| HETATM | 78 | C19B | UNK | 0 | 1 | 0.590  | 3.216  | 2.292 | 1.00 | 0.00 |
| HETATM | 79 | H19B | UNK | 0 | 1 | 0.356  | 3.817  | 1.622 | 1.00 | 0.00 |
| HETATM | 80 | C20B | UNK | 0 | 1 | -0.336 | 2.929  | 3.419 | 1.00 | 0.00 |
| HETATM | 81 | C21B | UNK | 0 | 1 | -1.382 | 4.033  | 3.604 | 1.00 | 0.00 |
| HETATM | 82 | H21D | UNK | 0 | 1 | -1.955 | 3.811  | 4.341 | 1.00 | 0.00 |
| HETATM | 83 | H21E | UNK | 0 | 1 | -1.908 | 4.114  | 2.805 | 1.00 | 0.00 |
| HETATM | 84 | H21F | UNK | 0 | 1 | -0.941 | 4.867  | 3.783 | 1.00 | 0.00 |
| HETATM | 85 | O1W  | UNK | 0 | 1 | -1.279 | 3.755  | 6.882 | 1.00 | 0.00 |
| HETATM | 86 | H1WA | UNK | 0 | 1 | -0.572 | 3.149  | 7.102 | 1.00 | 0.00 |
| HETATM | 87 | H1WB | UNK | 0 | 1 | -1.089 | 4.322  | 7.854 | 1.00 | 0.00 |

|         |    |    |    |
|---------|----|----|----|
| CONNECT | 1  | 4  | 53 |
| CONNECT | 2  | 3  | 28 |
| CONNECT | 3  | 4  |    |
| CONNECT | 4  | 5  | 16 |
| CONNECT | 5  | 6  | 14 |
| CONNECT | 6  | 7  | 8  |
| CONNECT | 7  |    |    |
| CONNECT | 8  | 9  | 10 |
| CONNECT | 9  |    |    |
| CONNECT | 10 | 11 | 12 |
| CONNECT | 11 |    |    |
| CONNECT | 12 | 13 | 14 |
| CONNECT | 13 |    |    |
| CONNECT | 14 | 15 |    |
| CONNECT | 15 |    |    |
| CONNECT | 16 | 17 | 25 |
| CONNECT | 17 | 18 | 19 |
| CONNECT | 18 |    |    |
| CONNECT | 19 | 20 | 21 |
| CONNECT | 20 |    |    |
| CONNECT | 21 | 22 | 23 |
| CONNECT | 22 |    |    |
| CONNECT | 23 | 24 | 25 |
| CONNECT | 24 |    |    |
| CONNECT | 25 | 26 |    |
| CONNECT | 26 |    |    |
| CONNECT | 27 | 30 | 54 |
| CONNECT | 28 | 29 |    |
| CONNECT | 29 | 30 |    |
| CONNECT | 30 | 31 | 42 |
| CONNECT | 31 | 32 | 40 |
| CONNECT | 32 | 33 | 34 |
| CONNECT | 33 |    |    |
| CONNECT | 34 | 35 | 36 |
| CONNECT | 35 |    |    |
| CONNECT | 36 | 37 | 38 |
| CONNECT | 37 |    |    |
| CONNECT | 38 | 39 | 40 |



| HEADER |          | CSD ENTRY hplrest1 |          |       |       |          |        |        |      |      |
|--------|----------|--------------------|----------|-------|-------|----------|--------|--------|------|------|
| CRYST1 | 6.8620   | 10.2280            | 12.5800  | 97.06 | 92.72 | 102.46   |        |        | P-1  |      |
| SCALE1 | 0.145730 | 0.032188           | 0.011432 |       |       | 0.000000 |        |        |      |      |
| SCALE2 | 0.000000 | 0.100127           | 0.013798 |       |       | 0.000000 |        |        |      |      |
| SCALE3 | 0.000000 | 0.000000           | 0.080333 |       |       | 0.000000 |        |        |      |      |
| HETATM | 1        | O1                 | UNK      | 0     | 1     | 1.550    | 7.246  | 3.941  | 1.00 | 0.00 |
| HETATM | 2        | H1                 | UNK      | 0     | 1     | 1.802    | 6.696  | 4.531  | 1.00 | 0.00 |
| HETATM | 3        | C1                 | UNK      | 0     | 1     | 3.952    | 8.951  | 5.688  | 1.00 | 0.00 |
| HETATM | 4        | C2                 | UNK      | 0     | 1     | 3.279    | 8.674  | 4.719  | 1.00 | 0.00 |
| HETATM | 5        | C3                 | UNK      | 0     | 1     | 2.461    | 8.304  | 3.593  | 1.00 | 0.00 |
| HETATM | 6        | C4                 | UNK      | 0     | 1     | 3.423    | 7.744  | 2.439  | 1.00 | 0.00 |
| HETATM | 7        | C5                 | UNK      | 0     | 1     | 2.979    | 6.747  | 1.555  | 1.00 | 0.00 |
| HETATM | 8        | H5                 | UNK      | 0     | 1     | 2.089    | 6.384  | 1.556  | 1.00 | 0.00 |
| HETATM | 9        | C6                 | UNK      | 0     | 1     | 3.851    | 6.359  | 0.537  | 1.00 | 0.00 |
| HETATM | 10       | H6                 | UNK      | 0     | 1     | 3.651    | 5.641  | -0.068 | 1.00 | 0.00 |
| HETATM | 11       | C7                 | UNK      | 0     | 1     | 5.049    | 6.916  | 0.400  | 1.00 | 0.00 |
| HETATM | 12       | H7                 | UNK      | 0     | 1     | 5.572    | 6.714  | -0.378 | 1.00 | 0.00 |
| HETATM | 13       | C8                 | UNK      | 0     | 1     | 5.473    | 7.854  | 1.277  | 1.00 | 0.00 |
| HETATM | 14       | H8                 | UNK      | 0     | 1     | 6.401    | 8.107  | 1.236  | 1.00 | 0.00 |
| HETATM | 15       | C9                 | UNK      | 0     | 1     | 4.638    | 8.295  | 2.277  | 1.00 | 0.00 |
| HETATM | 16       | H9                 | UNK      | 0     | 1     | 4.945    | 9.019  | 2.827  | 1.00 | 0.00 |
| HETATM | 17       | C10                | UNK      | 0     | 1     | 1.644    | 9.479  | 3.181  | 1.00 | 0.00 |
| HETATM | 18       | C11                | UNK      | 0     | 1     | 0.600    | 9.981  | 3.957  | 1.00 | 0.00 |
| HETATM | 19       | H11                | UNK      | 0     | 1     | 0.627    | 9.335  | 4.662  | 1.00 | 0.00 |
| HETATM | 20       | C12                | UNK      | 0     | 1     | -0.142   | 11.081 | 3.585  | 1.00 | 0.00 |
| HETATM | 21       | H12                | UNK      | 0     | 1     | -0.786   | 11.376 | 4.227  | 1.00 | 0.00 |
| HETATM | 22       | C13                | UNK      | 0     | 1     | 0.103    | 11.738 | 2.373  | 1.00 | 0.00 |
| HETATM | 23       | H13                | UNK      | 0     | 1     | -0.477   | 12.497 | 2.337  | 1.00 | 0.00 |
| HETATM | 24       | C14                | UNK      | 0     | 1     | 1.115    | 11.255 | 1.598  | 1.00 | 0.00 |
| HETATM | 25       | H14                | UNK      | 0     | 1     | 1.101    | 11.669 | 0.733  | 1.00 | 0.00 |
| HETATM | 26       | C15                | UNK      | 0     | 1     | 1.884    | 10.144 | 1.981  | 1.00 | 0.00 |
| HETATM | 27       | H15                | UNK      | 0     | 1     | 2.590    | 9.993  | 1.346  | 1.00 | 0.00 |
| HETATM | 28       | O1                 | UNK      | 0     | 1     | 7.165    | 11.013 | 8.507  | 1.00 | 0.00 |
| HETATM | 29       | H1                 | UNK      | 0     | 1     | 6.912    | 11.563 | 7.917  | 1.00 | 0.00 |
| HETATM | 30       | C1                 | UNK      | 0     | 1     | 4.763    | 9.308  | 6.761  | 1.00 | 0.00 |
| HETATM | 31       | C2                 | UNK      | 0     | 1     | 5.435    | 9.585  | 7.729  | 1.00 | 0.00 |
| HETATM | 32       | C3                 | UNK      | 0     | 1     | 6.253    | 9.955  | 8.856  | 1.00 | 0.00 |
| HETATM | 33       | C4                 | UNK      | 0     | 1     | 5.291    | 10.515 | 10.010 | 1.00 | 0.00 |
| HETATM | 34       | C5                 | UNK      | 0     | 1     | 5.736    | 11.512 | 10.893 | 1.00 | 0.00 |
| HETATM | 35       | H5                 | UNK      | 0     | 1     | 6.626    | 11.875 | 10.892 | 1.00 | 0.00 |
| HETATM | 36       | C6                 | UNK      | 0     | 1     | 4.864    | 11.900 | 11.912 | 1.00 | 0.00 |
| HETATM | 37       | H6                 | UNK      | 0     | 1     | 5.064    | 12.618 | 12.517 | 1.00 | 0.00 |
| HETATM | 38       | C7                 | UNK      | 0     | 1     | 3.665    | 11.343 | 12.049 | 1.00 | 0.00 |
| HETATM | 39       | H7                 | UNK      | 0     | 1     | 3.142    | 11.545 | 12.827 | 1.00 | 0.00 |
| HETATM | 40       | C8                 | UNK      | 0     | 1     | 3.241    | 10.405 | 11.171 | 1.00 | 0.00 |
| HETATM | 41       | H8                 | UNK      | 0     | 1     | 2.314    | 10.152 | 11.212 | 1.00 | 0.00 |
| HETATM | 42       | C9                 | UNK      | 0     | 1     | 4.076    | 9.964  | 10.171 | 1.00 | 0.00 |
| HETATM | 43       | H9                 | UNK      | 0     | 1     | 3.769    | 9.240  | 9.621  | 1.00 | 0.00 |
| HETATM | 44       | C10                | UNK      | 0     | 1     | 7.071    | 8.780  | 9.268  | 1.00 | 0.00 |
| HETATM | 45       | C11                | UNK      | 0     | 1     | 8.114    | 8.278  | 8.491  | 1.00 | 0.00 |
| HETATM | 46       | H11                | UNK      | 0     | 1     | 8.088    | 8.924  | 7.786  | 1.00 | 0.00 |
| HETATM | 47       | C12                | UNK      | 0     | 1     | 8.856    | 7.178  | 8.863  | 1.00 | 0.00 |
| HETATM | 48       | H12                | UNK      | 0     | 1     | 9.500    | 6.883  | 8.221  | 1.00 | 0.00 |
| HETATM | 49       | C13                | UNK      | 0     | 1     | 8.611    | 6.521  | 10.076 | 1.00 | 0.00 |
| HETATM | 50       | H13                | UNK      | 0     | 1     | 9.192    | 5.762  | 10.112 | 1.00 | 0.00 |
| HETATM | 51       | C14                | UNK      | 0     | 1     | 7.600    | 7.004  | 10.850 | 1.00 | 0.00 |
| HETATM | 52       | H14                | UNK      | 0     | 1     | 7.614    | 6.590  | 11.715 | 1.00 | 0.00 |
| HETATM | 53       | C15                | UNK      | 0     | 1     | 6.831    | 8.115  | 10.468 | 1.00 | 0.00 |
| HETATM | 54       | H15                | UNK      | 0     | 1     | 6.124    | 8.267  | 11.103 | 1.00 | 0.00 |
| HETATM | 55       | O2                 | UNK      | 0     | 1     | 1.220    | 3.154  | 7.420  | 1.00 | 0.00 |
| HETATM | 56       | N1                 | UNK      | 0     | 1     | 0.329    | 3.831  | 5.461  | 1.00 | 0.00 |
| HETATM | 57       | H1N1               | UNK      | 0     | 1     | 1.216    | 4.055  | 5.172  | 1.00 | 0.00 |
| HETATM | 58       | C16                | UNK      | 0     | 1     | 0.249    | 3.308  | 6.640  | 1.00 | 0.00 |
| HETATM | 59       | C17                | UNK      | 0     | 1     | -1.148   | 2.847  | 7.155  | 1.00 | 0.00 |
| HETATM | 60       | H17                | UNK      | 0     | 1     | -1.095   | 2.193  | 7.856  | 1.00 | 0.00 |

|         |    |      |     |   |    |        |       |       |      |      |
|---------|----|------|-----|---|----|--------|-------|-------|------|------|
| HETATM  | 61 | C18  | UNK | 0 | 1  | -1.847 | 2.270 | 6.004 | 1.00 | 0.00 |
| HETATM  | 62 | H18  | UNK | 0 | 1  | -2.388 | 1.492 | 6.157 | 1.00 | 0.00 |
| HETATM  | 63 | C19  | UNK | 0 | 1  | -1.791 | 2.815 | 4.821 | 1.00 | 0.00 |
| HETATM  | 64 | H19  | UNK | 0 | 1  | -2.255 | 2.403 | 4.089 | 1.00 | 0.00 |
| HETATM  | 65 | C20  | UNK | 0 | 1  | -0.926 | 4.091 | 4.714 | 1.00 | 0.00 |
| HETATM  | 66 | C21  | UNK | 0 | 1  | -0.536 | 4.413 | 3.258 | 1.00 | 0.00 |
| HETATM  | 67 | H21A | UNK | 0 | 1  | -1.326 | 4.565 | 2.734 | 1.00 | 0.00 |
| HETATM  | 68 | H21B | UNK | 0 | 1  | -0.055 | 3.663 | 2.902 | 1.00 | 0.00 |
| HETATM  | 69 | H21C | UNK | 0 | 1  | 0.021  | 5.194 | 3.229 | 1.00 | 0.00 |
| HETATM  | 70 | O2   | UNK | 0 | 1  | -4.024 | 5.118 | 5.028 | 1.00 | 0.00 |
| HETATM  | 71 | N1   | UNK | 0 | 1  | -3.133 | 4.441 | 6.987 | 1.00 | 0.00 |
| HETATM  | 72 | H1N1 | UNK | 0 | 1  | -4.020 | 4.217 | 7.276 | 1.00 | 0.00 |
| HETATM  | 73 | C16  | UNK | 0 | 1  | -3.052 | 4.964 | 5.808 | 1.00 | 0.00 |
| HETATM  | 74 | C17  | UNK | 0 | 1  | -1.655 | 5.425 | 5.293 | 1.00 | 0.00 |
| HETATM  | 75 | H17  | UNK | 0 | 1  | -1.709 | 6.079 | 4.592 | 1.00 | 0.00 |
| HETATM  | 76 | C18  | UNK | 0 | 1  | -0.956 | 6.002 | 6.444 | 1.00 | 0.00 |
| HETATM  | 77 | H18  | UNK | 0 | 1  | -0.416 | 6.780 | 6.291 | 1.00 | 0.00 |
| HETATM  | 78 | C19  | UNK | 0 | 1  | -1.012 | 5.457 | 7.627 | 1.00 | 0.00 |
| HETATM  | 79 | H19  | UNK | 0 | 1  | -0.548 | 5.869 | 8.359 | 1.00 | 0.00 |
| HETATM  | 80 | C20  | UNK | 0 | 1  | -1.878 | 4.181 | 7.734 | 1.00 | 0.00 |
| HETATM  | 81 | C21  | UNK | 0 | 1  | -2.267 | 3.859 | 9.190 | 1.00 | 0.00 |
| HETATM  | 82 | H21A | UNK | 0 | 1  | -1.477 | 3.707 | 9.715 | 1.00 | 0.00 |
| HETATM  | 83 | H21B | UNK | 0 | 1  | -2.748 | 4.609 | 9.546 | 1.00 | 0.00 |
| HETATM  | 84 | H21C | UNK | 0 | 1  | -2.825 | 3.078 | 9.219 | 1.00 | 0.00 |
| CONNECT | 1  | 2    |     |   | 5  |        |       |       |      |      |
| CONNECT | 2  |      |     |   |    |        |       |       |      |      |
| CONNECT | 3  | 4    |     |   | 30 |        |       |       |      |      |
| CONNECT | 4  | 5    |     |   |    |        |       |       |      |      |
| CONNECT | 5  | 6    |     |   | 17 |        |       |       |      |      |
| CONNECT | 6  | 7    |     |   | 15 |        |       |       |      |      |
| CONNECT | 7  | 8    |     |   | 9  |        |       |       |      |      |
| CONNECT | 8  |      |     |   |    |        |       |       |      |      |
| CONNECT | 9  | 10   |     |   | 11 |        |       |       |      |      |
| CONNECT | 10 |      |     |   |    |        |       |       |      |      |
| CONNECT | 11 | 12   |     |   | 13 |        |       |       |      |      |
| CONNECT | 12 |      |     |   |    |        |       |       |      |      |
| CONNECT | 13 | 14   |     |   | 15 |        |       |       |      |      |
| CONNECT | 14 |      |     |   |    |        |       |       |      |      |
| CONNECT | 15 | 16   |     |   |    |        |       |       |      |      |
| CONNECT | 16 |      |     |   |    |        |       |       |      |      |
| CONNECT | 17 | 18   |     |   | 26 |        |       |       |      |      |
| CONNECT | 18 | 19   |     |   | 20 |        |       |       |      |      |
| CONNECT | 19 |      |     |   |    |        |       |       |      |      |
| CONNECT | 20 | 21   |     |   | 22 |        |       |       |      |      |
| CONNECT | 21 |      |     |   |    |        |       |       |      |      |
| CONNECT | 22 | 23   |     |   | 24 |        |       |       |      |      |
| CONNECT | 23 |      |     |   |    |        |       |       |      |      |
| CONNECT | 24 | 25   |     |   | 26 |        |       |       |      |      |
| CONNECT | 25 |      |     |   |    |        |       |       |      |      |
| CONNECT | 26 | 27   |     |   |    |        |       |       |      |      |
| CONNECT | 27 |      |     |   |    |        |       |       |      |      |
| CONNECT | 28 | 29   |     |   | 32 |        |       |       |      |      |
| CONNECT | 29 |      |     |   |    |        |       |       |      |      |
| CONNECT | 30 | 31   |     |   |    |        |       |       |      |      |
| CONNECT | 31 | 32   |     |   |    |        |       |       |      |      |
| CONNECT | 32 | 33   |     |   | 44 |        |       |       |      |      |
| CONNECT | 33 | 34   |     |   | 42 |        |       |       |      |      |
| CONNECT | 34 | 35   |     |   | 36 |        |       |       |      |      |
| CONNECT | 35 |      |     |   |    |        |       |       |      |      |
| CONNECT | 36 | 37   |     |   | 38 |        |       |       |      |      |
| CONNECT | 37 |      |     |   |    |        |       |       |      |      |
| CONNECT | 38 | 39   |     |   | 40 |        |       |       |      |      |
| CONNECT | 39 |      |     |   |    |        |       |       |      |      |
| CONNECT | 40 | 41   |     |   | 42 |        |       |       |      |      |
| CONNECT | 41 |      |     |   |    |        |       |       |      |      |



| HEADER CSD ENTRY pyr102r12 |          |           |           |       |       |          |        |        |           |
|----------------------------|----------|-----------|-----------|-------|-------|----------|--------|--------|-----------|
| CRYST1                     | 7.7433   | 7.7868    | 13.5188   | 88.12 | 76.67 | 86.03    |        |        | P-1       |
| SCALE1                     | 0.129144 | -0.008963 | -0.030436 |       |       | 0.000000 |        |        |           |
| SCALE2                     | 0.000000 | 0.128731  | -0.002246 |       |       | 0.000000 |        |        |           |
| SCALE3                     | 0.000000 | 0.000000  | 0.076029  |       |       | 0.000000 |        |        |           |
| HETATM                     | 1        | O1        | UNK       | 0     | 1     | 7.234    | 1.123  | 3.125  | 1.00 0.00 |
| HETATM                     | 2        | H1O1      | UNK       | 0     | 1     | 7.872    | 1.021  | 3.762  | 1.00 0.00 |
| HETATM                     | 3        | C1        | UNK       | 0     | 1     | 5.542    | 0.145  | 5.899  | 1.00 0.00 |
| HETATM                     | 4        | C2        | UNK       | 0     | 1     | 5.735    | 0.200  | 4.718  | 1.00 0.00 |
| HETATM                     | 5        | C3        | UNK       | 0     | 1     | 6.112    | 0.261  | 3.288  | 1.00 0.00 |
| HETATM                     | 6        | C4        | UNK       | 0     | 1     | 6.438    | -1.161 | 2.809  | 1.00 0.00 |
| HETATM                     | 7        | C5        | UNK       | 0     | 1     | 7.608    | -1.440 | 2.118  | 1.00 0.00 |
| HETATM                     | 8        | H5        | UNK       | 0     | 1     | 8.232    | -0.767 | 1.969  | 1.00 0.00 |
| HETATM                     | 9        | C6        | UNK       | 0     | 1     | 7.849    | -2.732 | 1.645  | 1.00 0.00 |
| HETATM                     | 10       | H6        | UNK       | 0     | 1     | 8.633    | -2.916 | 1.182  | 1.00 0.00 |
| HETATM                     | 11       | C7        | UNK       | 0     | 1     | 6.945    | -3.719 | 1.856  | 1.00 0.00 |
| HETATM                     | 12       | H7        | UNK       | 0     | 1     | 7.114    | -4.577 | 1.540  | 1.00 0.00 |
| HETATM                     | 13       | C8        | UNK       | 0     | 1     | 5.771    | -3.454 | 2.537  | 1.00 0.00 |
| HETATM                     | 14       | H8        | UNK       | 0     | 1     | 5.149    | -4.133 | 2.675  | 1.00 0.00 |
| HETATM                     | 15       | C9        | UNK       | 0     | 1     | 5.526    | -2.182 | 3.013  | 1.00 0.00 |
| HETATM                     | 16       | H9        | UNK       | 0     | 1     | 4.738    | -2.009 | 3.475  | 1.00 0.00 |
| HETATM                     | 17       | C10       | UNK       | 0     | 1     | 4.999    | 0.830  | 2.427  | 1.00 0.00 |
| HETATM                     | 18       | C11       | UNK       | 0     | 1     | 5.282    | 1.135  | 1.088  | 1.00 0.00 |
| HETATM                     | 19       | H11       | UNK       | 0     | 1     | 6.126    | 0.959  | 0.739  | 1.00 0.00 |
| HETATM                     | 20       | C12       | UNK       | 0     | 1     | 4.316    | 1.695  | 0.287  | 1.00 0.00 |
| HETATM                     | 21       | H12       | UNK       | 0     | 1     | 4.519    | 1.916  | -0.593 | 1.00 0.00 |
| HETATM                     | 22       | C13       | UNK       | 0     | 1     | 3.064    | 1.927  | 0.768  | 1.00 0.00 |
| HETATM                     | 23       | H13       | UNK       | 0     | 1     | 2.417    | 2.305  | 0.218  | 1.00 0.00 |
| HETATM                     | 24       | C14       | UNK       | 0     | 1     | 2.761    | 1.607  | 2.061  | 1.00 0.00 |
| HETATM                     | 25       | H14       | UNK       | 0     | 1     | 1.903    | 1.761  | 2.386  | 1.00 0.00 |
| HETATM                     | 26       | C15       | UNK       | 0     | 1     | 3.712    | 1.059  | 2.884  | 1.00 0.00 |
| HETATM                     | 27       | H15       | UNK       | 0     | 1     | 3.490    | 0.838  | 3.760  | 1.00 0.00 |
| HETATM                     | 28       | O1        | UNK       | 0     | 1     | 3.625    | -0.894 | 10.028 | 1.00 0.00 |
| HETATM                     | 29       | H1O1      | UNK       | 0     | 1     | 2.987    | -0.792 | 9.391  | 1.00 0.00 |
| HETATM                     | 30       | C1        | UNK       | 0     | 1     | 5.317    | 0.085  | 7.254  | 1.00 0.00 |
| HETATM                     | 31       | C2        | UNK       | 0     | 1     | 5.124    | 0.030  | 8.435  | 1.00 0.00 |
| HETATM                     | 32       | C3        | UNK       | 0     | 1     | 4.747    | -0.031 | 9.865  | 1.00 0.00 |
| HETATM                     | 33       | C4        | UNK       | 0     | 1     | 4.421    | 1.391  | 10.343 | 1.00 0.00 |
| HETATM                     | 34       | C5        | UNK       | 0     | 1     | 3.251    | 1.669  | 11.035 | 1.00 0.00 |
| HETATM                     | 35       | H5        | UNK       | 0     | 1     | 2.627    | 0.996  | 11.184 | 1.00 0.00 |
| HETATM                     | 36       | C6        | UNK       | 0     | 1     | 3.010    | 2.962  | 11.507 | 1.00 0.00 |
| HETATM                     | 37       | H6        | UNK       | 0     | 1     | 2.226    | 3.146  | 11.970 | 1.00 0.00 |
| HETATM                     | 38       | C7        | UNK       | 0     | 1     | 3.914    | 3.948  | 11.297 | 1.00 0.00 |
| HETATM                     | 39       | H7        | UNK       | 0     | 1     | 3.745    | 4.807  | 11.613 | 1.00 0.00 |
| HETATM                     | 40       | C8        | UNK       | 0     | 1     | 5.088    | 3.684  | 10.616 | 1.00 0.00 |
| HETATM                     | 41       | H8        | UNK       | 0     | 1     | 5.710    | 4.362  | 10.478 | 1.00 0.00 |
| HETATM                     | 42       | C9        | UNK       | 0     | 1     | 5.333    | 2.412  | 10.140 | 1.00 0.00 |
| HETATM                     | 43       | H9        | UNK       | 0     | 1     | 6.121    | 2.238  | 9.678  | 1.00 0.00 |
| HETATM                     | 44       | C10       | UNK       | 0     | 1     | 5.860    | -0.601 | 10.726 | 1.00 0.00 |
| HETATM                     | 45       | C11       | UNK       | 0     | 1     | 5.577    | -0.906 | 12.065 | 1.00 0.00 |
| HETATM                     | 46       | H11       | UNK       | 0     | 1     | 4.733    | -0.730 | 12.414 | 1.00 0.00 |
| HETATM                     | 47       | C12       | UNK       | 0     | 1     | 6.543    | -1.465 | 12.866 | 1.00 0.00 |
| HETATM                     | 48       | H12       | UNK       | 0     | 1     | 6.340    | -1.687 | 13.746 | 1.00 0.00 |
| HETATM                     | 49       | C13       | UNK       | 0     | 1     | 7.795    | -1.698 | 12.385 | 1.00 0.00 |
| HETATM                     | 50       | H13       | UNK       | 0     | 1     | 8.442    | -2.075 | 12.935 | 1.00 0.00 |
| HETATM                     | 51       | C14       | UNK       | 0     | 1     | 8.098    | -1.377 | 11.092 | 1.00 0.00 |
| HETATM                     | 52       | H14       | UNK       | 0     | 1     | 8.956    | -1.531 | 10.767 | 1.00 0.00 |
| HETATM                     | 53       | C15       | UNK       | 0     | 1     | 7.147    | -0.829 | 10.268 | 1.00 0.00 |
| HETATM                     | 54       | H15       | UNK       | 0     | 1     | 7.369    | -0.608 | 9.392  | 1.00 0.00 |
| HETATM                     | 55       | O2        | UNK       | 0     | 1     | 2.490    | 6.773  | 7.921  | 1.00 0.00 |
| HETATM                     | 56       | N1        | UNK       | 0     | 1     | 1.995    | 5.803  | 5.957  | 1.00 0.00 |
| HETATM                     | 57       | H1N1      | UNK       | 0     | 1     | 0.993    | 6.485  | 5.721  | 1.00 0.00 |
| HETATM                     | 58       | C16       | UNK       | 0     | 1     | 2.453    | 5.761  | 7.205  | 1.00 0.00 |
| HETATM                     | 59       | C17       | UNK       | 0     | 1     | 2.919    | 4.410  | 7.688  | 1.00 0.00 |
| HETATM                     | 60       | H17       | UNK       | 0     | 1     | 3.453    | 4.517  | 8.503  | 1.00 0.00 |

|         |    |      |     |   |   |        |       |       |      |      |
|---------|----|------|-----|---|---|--------|-------|-------|------|------|
| HETATM  | 61 | C18  | UNK | 0 | 1 | 3.758  | 3.809 | 6.615 | 1.00 | 0.00 |
| HETATM  | 62 | H18  | UNK | 0 | 1 | 4.563  | 3.393 | 6.822 | 1.00 | 0.00 |
| HETATM  | 63 | C19  | UNK | 0 | 1 | 3.346  | 3.877 | 5.369 | 1.00 | 0.00 |
| HETATM  | 64 | H19  | UNK | 0 | 1 | 3.837  | 3.520 | 4.665 | 1.00 | 0.00 |
| HETATM  | 65 | C20  | UNK | 0 | 1 | 2.033  | 4.564 | 5.155 | 1.00 | 0.00 |
| HETATM  | 66 | H20  | UNK | 0 | 1 | 1.987  | 4.823 | 4.210 | 1.00 | 0.00 |
| HETATM  | 67 | O2   | UNK | 0 | 1 | 1.165  | 1.225 | 5.232 | 1.00 | 0.00 |
| HETATM  | 68 | N1   | UNK | 0 | 1 | 1.660  | 2.195 | 7.196 | 1.00 | 0.00 |
| HETATM  | 69 | H1N1 | UNK | 0 | 1 | 2.662  | 1.512 | 7.431 | 1.00 | 0.00 |
| HETATM  | 70 | C16  | UNK | 0 | 1 | 1.202  | 2.237 | 5.948 | 1.00 | 0.00 |
| HETATM  | 71 | C17  | UNK | 0 | 1 | 0.736  | 3.588 | 5.465 | 1.00 | 0.00 |
| HETATM  | 72 | H17  | UNK | 0 | 1 | 0.202  | 3.480 | 4.650 | 1.00 | 0.00 |
| HETATM  | 73 | C18  | UNK | 0 | 1 | -0.103 | 4.188 | 6.538 | 1.00 | 0.00 |
| HETATM  | 74 | H18  | UNK | 0 | 1 | -0.908 | 4.605 | 6.330 | 1.00 | 0.00 |
| HETATM  | 75 | C19  | UNK | 0 | 1 | 0.309  | 4.121 | 7.784 | 1.00 | 0.00 |
| HETATM  | 76 | H19  | UNK | 0 | 1 | -0.182 | 4.477 | 8.488 | 1.00 | 0.00 |
| HETATM  | 77 | C20  | UNK | 0 | 1 | 1.622  | 3.434 | 7.998 | 1.00 | 0.00 |
| HETATM  | 78 | H20  | UNK | 0 | 1 | 1.667  | 3.175 | 8.943 | 1.00 | 0.00 |
| CONNECT | 1  | 2    | 5   |   |   |        |       |       |      |      |
| CONNECT | 2  |      |     |   |   |        |       |       |      |      |
| CONNECT | 3  | 4    | 30  |   |   |        |       |       |      |      |
| CONNECT | 4  | 5    |     |   |   |        |       |       |      |      |
| CONNECT | 5  | 6    | 17  |   |   |        |       |       |      |      |
| CONNECT | 6  | 7    | 15  |   |   |        |       |       |      |      |
| CONNECT | 7  | 8    | 9   |   |   |        |       |       |      |      |
| CONNECT | 8  |      |     |   |   |        |       |       |      |      |
| CONNECT | 9  | 10   | 11  |   |   |        |       |       |      |      |
| CONNECT | 10 |      |     |   |   |        |       |       |      |      |
| CONNECT | 11 | 12   | 13  |   |   |        |       |       |      |      |
| CONNECT | 12 |      |     |   |   |        |       |       |      |      |
| CONNECT | 13 | 14   | 15  |   |   |        |       |       |      |      |
| CONNECT | 14 |      |     |   |   |        |       |       |      |      |
| CONNECT | 15 | 16   |     |   |   |        |       |       |      |      |
| CONNECT | 16 |      |     |   |   |        |       |       |      |      |
| CONNECT | 17 | 18   | 26  |   |   |        |       |       |      |      |
| CONNECT | 18 | 19   | 20  |   |   |        |       |       |      |      |
| CONNECT | 19 |      |     |   |   |        |       |       |      |      |
| CONNECT | 20 | 21   | 22  |   |   |        |       |       |      |      |
| CONNECT | 21 |      |     |   |   |        |       |       |      |      |
| CONNECT | 22 | 23   | 24  |   |   |        |       |       |      |      |
| CONNECT | 23 |      |     |   |   |        |       |       |      |      |
| CONNECT | 24 | 25   | 26  |   |   |        |       |       |      |      |
| CONNECT | 25 |      |     |   |   |        |       |       |      |      |
| CONNECT | 26 | 27   |     |   |   |        |       |       |      |      |
| CONNECT | 27 |      |     |   |   |        |       |       |      |      |
| CONNECT | 28 | 29   | 32  |   |   |        |       |       |      |      |
| CONNECT | 29 |      |     |   |   |        |       |       |      |      |
| CONNECT | 30 | 31   |     |   |   |        |       |       |      |      |
| CONNECT | 31 | 32   |     |   |   |        |       |       |      |      |
| CONNECT | 32 | 33   | 44  |   |   |        |       |       |      |      |
| CONNECT | 33 | 34   | 42  |   |   |        |       |       |      |      |
| CONNECT | 34 | 35   | 36  |   |   |        |       |       |      |      |
| CONNECT | 35 |      |     |   |   |        |       |       |      |      |
| CONNECT | 36 | 37   | 38  |   |   |        |       |       |      |      |
| CONNECT | 37 |      |     |   |   |        |       |       |      |      |
| CONNECT | 38 | 39   | 40  |   |   |        |       |       |      |      |
| CONNECT | 39 |      |     |   |   |        |       |       |      |      |
| CONNECT | 40 | 41   | 42  |   |   |        |       |       |      |      |
| CONNECT | 41 |      |     |   |   |        |       |       |      |      |
| CONNECT | 42 | 43   |     |   |   |        |       |       |      |      |
| CONNECT | 43 |      |     |   |   |        |       |       |      |      |
| CONNECT | 44 | 45   | 53  |   |   |        |       |       |      |      |
| CONNECT | 45 | 46   | 47  |   |   |        |       |       |      |      |
| CONNECT | 46 |      |     |   |   |        |       |       |      |      |
| CONNECT | 47 | 48   | 49  |   |   |        |       |       |      |      |



| HEADER | CSD ENTRY pyr102rest1 |          |          |       |       |          |        |        |      |      |
|--------|-----------------------|----------|----------|-------|-------|----------|--------|--------|------|------|
| CRYST1 | 6.1510                | 9.1140   | 13.1100  | 95.93 | 93.28 | 100.18   |        | P-1    |      |      |
| SCALE1 | 0.162575              | 0.029193 | 0.012772 |       |       | 0.000000 |        |        |      |      |
| SCALE2 | 0.000000              | 0.111476 | 0.012954 |       |       | 0.000000 |        |        |      |      |
| SCALE3 | 0.000000              | 0.000000 | 0.076917 |       |       | 0.000000 |        |        |      |      |
| HETATM | 1                     | O1       | UNK      | 0     | 1     | 1.458    | 3.606  | 9.397  | 1.00 | 0.00 |
| HETATM | 2                     | H1O1     | UNK      | 0     | 1     | 1.650    | 2.811  | 9.471  | 1.00 | 0.00 |
| HETATM | 3                     | C1       | UNK      | 0     | 1     | -0.898   | 3.731  | 7.127  | 1.00 | 0.00 |
| HETATM | 4                     | C2       | UNK      | 0     | 1     | -0.466   | 3.724  | 8.218  | 1.00 | 0.00 |
| HETATM | 5                     | C3       | UNK      | 0     | 1     | 0.092    | 3.765  | 9.540  | 1.00 | 0.00 |
| HETATM | 6                     | C4       | UNK      | 0     | 1     | -0.487   | 2.828  | 10.467 | 1.00 | 0.00 |
| HETATM | 7                     | C5       | UNK      | 0     | 1     | 0.162    | 2.531  | 11.642 | 1.00 | 0.00 |
| HETATM | 8                     | H5       | UNK      | 0     | 1     | 0.997    | 2.899  | 11.824 | 1.00 | 0.00 |
| HETATM | 9                     | C6       | UNK      | 0     | 1     | -0.422   | 1.701  | 12.529 | 1.00 | 0.00 |
| HETATM | 10                    | H6       | UNK      | 0     | 1     | -0.005   | 1.535  | 13.342 | 1.00 | 0.00 |
| HETATM | 11                    | C7       | UNK      | 0     | 1     | -1.594   | 1.113  | 12.265 | 1.00 | 0.00 |
| HETATM | 12                    | H7       | UNK      | 0     | 1     | -1.971   | 0.546  | 12.900 | 1.00 | 0.00 |
| HETATM | 13                    | C8       | UNK      | 0     | 1     | -2.241   | 1.323  | 11.099 | 1.00 | 0.00 |
| HETATM | 14                    | H8       | UNK      | 0     | 1     | -3.053   | 0.916  | 10.903 | 1.00 | 0.00 |
| HETATM | 15                    | C9       | UNK      | 0     | 1     | -1.624   | 2.170  | 10.232 | 1.00 | 0.00 |
| HETATM | 16                    | H9       | UNK      | 0     | 1     | -2.031   | 2.302  | 9.405  | 1.00 | 0.00 |
| HETATM | 17                    | C10      | UNK      | 0     | 1     | -0.145   | 5.147  | 10.090 | 1.00 | 0.00 |
| HETATM | 18                    | C11      | UNK      | 0     | 1     | -1.373   | 5.672  | 10.069 | 1.00 | 0.00 |
| HETATM | 19                    | H11      | UNK      | 0     | 1     | -2.070   | 5.188  | 9.687  | 1.00 | 0.00 |
| HETATM | 20                    | C12      | UNK      | 0     | 1     | -1.640   | 6.952  | 10.619 | 1.00 | 0.00 |
| HETATM | 21                    | H12      | UNK      | 0     | 1     | -2.487   | 7.332  | 10.563 | 1.00 | 0.00 |
| HETATM | 22                    | C13      | UNK      | 0     | 1     | -0.660   | 7.578  | 11.203 | 1.00 | 0.00 |
| HETATM | 23                    | H13      | UNK      | 0     | 1     | -0.834   | 8.390  | 11.623 | 1.00 | 0.00 |
| HETATM | 24                    | C14      | UNK      | 0     | 1     | 0.601    | 7.090  | 11.224 | 1.00 | 0.00 |
| HETATM | 25                    | H14      | UNK      | 0     | 1     | 1.291    | 7.594  | 11.587 | 1.00 | 0.00 |
| HETATM | 26                    | C15      | UNK      | 0     | 1     | 0.853    | 5.816  | 10.692 | 1.00 | 0.00 |
| HETATM | 27                    | H15      | UNK      | 0     | 1     | 1.699    | 5.440  | 10.757 | 1.00 | 0.00 |
| HETATM | 28                    | O1       | UNK      | 0     | 1     | -3.819   | 3.854  | 3.604  | 1.00 | 0.00 |
| HETATM | 29                    | H1O1     | UNK      | 0     | 1     | -4.011   | 4.648  | 3.530  | 1.00 | 0.00 |
| HETATM | 30                    | C1       | UNK      | 0     | 1     | -1.463   | 3.729  | 5.874  | 1.00 | 0.00 |
| HETATM | 31                    | C2       | UNK      | 0     | 1     | -1.895   | 3.736  | 4.783  | 1.00 | 0.00 |
| HETATM | 32                    | C3       | UNK      | 0     | 1     | -2.453   | 3.695  | 3.461  | 1.00 | 0.00 |
| HETATM | 33                    | C4       | UNK      | 0     | 1     | -1.874   | 4.632  | 2.534  | 1.00 | 0.00 |
| HETATM | 34                    | C5       | UNK      | 0     | 1     | -2.523   | 4.928  | 1.359  | 1.00 | 0.00 |
| HETATM | 35                    | H5       | UNK      | 0     | 1     | -3.358   | 4.560  | 1.177  | 1.00 | 0.00 |
| HETATM | 36                    | C6       | UNK      | 0     | 1     | -1.938   | 5.759  | 0.472  | 1.00 | 0.00 |
| HETATM | 37                    | H6       | UNK      | 0     | 1     | -2.356   | 5.925  | -0.341 | 1.00 | 0.00 |
| HETATM | 38                    | C7       | UNK      | 0     | 1     | -0.767   | 6.346  | 0.736  | 1.00 | 0.00 |
| HETATM | 39                    | H7       | UNK      | 0     | 1     | -0.389   | 6.913  | 0.101  | 1.00 | 0.00 |
| HETATM | 40                    | C8       | UNK      | 0     | 1     | -0.120   | 6.136  | 1.902  | 1.00 | 0.00 |
| HETATM | 41                    | H8       | UNK      | 0     | 1     | 0.692    | 6.543  | 2.098  | 1.00 | 0.00 |
| HETATM | 42                    | C9       | UNK      | 0     | 1     | -0.737   | 5.290  | 2.769  | 1.00 | 0.00 |
| HETATM | 43                    | H9       | UNK      | 0     | 1     | -0.330   | 5.158  | 3.596  | 1.00 | 0.00 |
| HETATM | 44                    | C10      | UNK      | 0     | 1     | -2.216   | 2.313  | 2.911  | 1.00 | 0.00 |
| HETATM | 45                    | C11      | UNK      | 0     | 1     | -0.988   | 1.788  | 2.932  | 1.00 | 0.00 |
| HETATM | 46                    | H11      | UNK      | 0     | 1     | -0.291   | 2.272  | 3.314  | 1.00 | 0.00 |
| HETATM | 47                    | C12      | UNK      | 0     | 1     | -0.721   | 0.507  | 2.382  | 1.00 | 0.00 |
| HETATM | 48                    | H12      | UNK      | 0     | 1     | 0.126    | 0.128  | 2.438  | 1.00 | 0.00 |
| HETATM | 49                    | C13      | UNK      | 0     | 1     | -1.701   | -0.118 | 1.798  | 1.00 | 0.00 |
| HETATM | 50                    | H13      | UNK      | 0     | 1     | -1.527   | -0.930 | 1.378  | 1.00 | 0.00 |
| HETATM | 51                    | C14      | UNK      | 0     | 1     | -2.962   | 0.369  | 1.777  | 1.00 | 0.00 |
| HETATM | 52                    | H14      | UNK      | 0     | 1     | -3.652   | -0.135 | 1.415  | 1.00 | 0.00 |
| HETATM | 53                    | C15      | UNK      | 0     | 1     | -3.214   | 1.643  | 2.309  | 1.00 | 0.00 |
| HETATM | 54                    | H15      | UNK      | 0     | 1     | -4.060   | 2.020  | 2.244  | 1.00 | 0.00 |
| HETATM | 55                    | O2       | UNK      | 0     | 1     | 0.120    | 10.010 | 8.733  | 1.00 | 0.00 |
| HETATM | 56                    | N1       | UNK      | 0     | 1     | -0.198   | 8.091  | 7.793  | 1.00 | 0.00 |
| HETATM | 57                    | H1       | UNK      | 0     | 1     | -0.522   | 7.771  | 8.522  | 1.00 | 0.00 |
| HETATM | 58                    | C16      | UNK      | 0     | 1     | 0.197    | 9.333  | 7.746  | 1.00 | 0.00 |
| HETATM | 59                    | C17      | UNK      | 0     | 1     | 0.775    | 9.741  | 6.471  | 1.00 | 0.00 |
| HETATM | 60                    | H17      | UNK      | 0     | 1     | 0.814    | 10.720 | 6.439  | 1.00 | 0.00 |

|        |    |     |     |   |   |        |       |       |      |      |
|--------|----|-----|-----|---|---|--------|-------|-------|------|------|
| HETATM | 61 | C18 | UNK | 0 | 1 | -0.056 | 9.282 | 5.412 | 1.00 | 0.00 |
| HETATM | 62 | H18 | UNK | 0 | 1 | -0.314 | 9.840 | 4.715 | 1.00 | 0.00 |
| HETATM | 63 | C19 | UNK | 0 | 1 | -0.434 | 8.087 | 5.444 | 1.00 | 0.00 |
| HETATM | 64 | H19 | UNK | 0 | 1 | -0.922 | 7.723 | 4.736 | 1.00 | 0.00 |
| HETATM | 65 | C20 | UNK | 0 | 1 | -0.085 | 7.286 | 6.585 | 1.00 | 0.00 |
| HETATM | 66 | H20 | UNK | 0 | 1 | -0.716 | 6.540 | 6.654 | 1.00 | 0.00 |
| HETATM | 67 | O2  | UNK | 0 | 1 | 2.060  | 6.420 | 4.268 | 1.00 | 0.00 |
| HETATM | 68 | N1  | UNK | 0 | 1 | 2.377  | 8.339 | 5.208 | 1.00 | 0.00 |
| HETATM | 69 | H1  | UNK | 0 | 1 | 2.701  | 8.659 | 4.479 | 1.00 | 0.00 |
| HETATM | 70 | C16 | UNK | 0 | 1 | 1.982  | 7.097 | 5.255 | 1.00 | 0.00 |
| HETATM | 71 | C17 | UNK | 0 | 1 | 1.404  | 6.689 | 6.530 | 1.00 | 0.00 |
| HETATM | 72 | H17 | UNK | 0 | 1 | 1.365  | 5.711 | 6.562 | 1.00 | 0.00 |
| HETATM | 73 | C18 | UNK | 0 | 1 | 2.235  | 7.149 | 7.589 | 1.00 | 0.00 |
| HETATM | 74 | H18 | UNK | 0 | 1 | 2.493  | 6.590 | 8.286 | 1.00 | 0.00 |
| HETATM | 75 | C19 | UNK | 0 | 1 | 2.614  | 8.343 | 7.558 | 1.00 | 0.00 |
| HETATM | 76 | H19 | UNK | 0 | 1 | 3.101  | 8.707 | 8.265 | 1.00 | 0.00 |
| HETATM | 77 | C20 | UNK | 0 | 1 | 2.264  | 9.144 | 6.416 | 1.00 | 0.00 |
| HETATM | 78 | H20 | UNK | 0 | 1 | 2.895  | 9.890 | 6.347 | 1.00 | 0.00 |

|         |    |    |    |
|---------|----|----|----|
| CONNECT | 1  | 2  | 5  |
| CONNECT | 2  |    |    |
| CONNECT | 3  | 4  | 30 |
| CONNECT | 4  | 5  |    |
| CONNECT | 5  | 6  | 17 |
| CONNECT | 6  | 7  | 15 |
| CONNECT | 7  | 8  | 9  |
| CONNECT | 8  |    |    |
| CONNECT | 9  | 10 | 11 |
| CONNECT | 10 |    |    |
| CONNECT | 11 | 12 | 13 |
| CONNECT | 12 |    |    |
| CONNECT | 13 | 14 | 15 |
| CONNECT | 14 |    |    |
| CONNECT | 15 | 16 |    |
| CONNECT | 16 |    |    |
| CONNECT | 17 | 18 | 26 |
| CONNECT | 18 | 19 | 20 |
| CONNECT | 19 |    |    |
| CONNECT | 20 | 21 | 22 |
| CONNECT | 21 |    |    |
| CONNECT | 22 | 23 | 24 |
| CONNECT | 23 |    |    |
| CONNECT | 24 | 25 | 26 |
| CONNECT | 25 |    |    |
| CONNECT | 26 | 27 |    |
| CONNECT | 27 |    |    |
| CONNECT | 28 | 29 | 32 |
| CONNECT | 29 |    |    |
| CONNECT | 30 | 31 |    |
| CONNECT | 31 | 32 |    |
| CONNECT | 32 | 33 | 44 |
| CONNECT | 33 | 34 | 42 |
| CONNECT | 34 | 35 | 36 |
| CONNECT | 35 |    |    |
| CONNECT | 36 | 37 | 38 |
| CONNECT | 37 |    |    |
| CONNECT | 38 | 39 | 40 |
| CONNECT | 39 |    |    |
| CONNECT | 40 | 41 | 42 |
| CONNECT | 41 |    |    |
| CONNECT | 42 | 43 |    |
| CONNECT | 43 |    |    |
| CONNECT | 44 | 45 | 53 |
| CONNECT | 45 | 46 | 47 |
| CONNECT | 46 |    |    |
| CONNECT | 47 | 48 | 49 |



| HEADER CSD ENTRY pyr102r13 |          |           |           |       |       |          |        |        |           |
|----------------------------|----------|-----------|-----------|-------|-------|----------|--------|--------|-----------|
| CRYST1                     | 10.4770  | 13.4500   | 16.9960   | 81.25 | 81.08 | 81.88    |        |        | P-1       |
| SCALE1                     | 0.095447 | -0.013618 | -0.013292 |       |       | 0.000000 |        |        |           |
| SCALE2                     | 0.000000 | 0.075102  | -0.010095 |       |       | 0.000000 |        |        |           |
| SCALE3                     | 0.000000 | 0.000000  | 0.060094  |       |       | 0.000000 |        |        |           |
| HETATM                     | 1        | O1A       | UNK       | 0     | 1     | 6.025    | 4.117  | 5.764  | 1.00 0.00 |
| HETATM                     | 2        | H10A      | UNK       | 0     | 1     | 5.338    | 3.696  | 5.616  | 1.00 0.00 |
| HETATM                     | 3        | C1A       | UNK       | 0     | 1     | 6.506    | 1.774  | 8.117  | 1.00 0.00 |
| HETATM                     | 4        | C2A       | UNK       | 0     | 1     | 6.377    | 2.896  | 7.718  | 1.00 0.00 |
| HETATM                     | 5        | C3A       | UNK       | 0     | 1     | 6.204    | 4.244  | 7.137  | 1.00 0.00 |
| HETATM                     | 6        | C4A       | UNK       | 0     | 1     | 4.893    | 4.795  | 7.798  | 1.00 0.00 |
| HETATM                     | 7        | C5A       | UNK       | 0     | 1     | 3.871    | 5.349  | 7.057  | 1.00 0.00 |
| HETATM                     | 8        | H5A       | UNK       | 0     | 1     | 3.905    | 5.300  | 6.129  | 1.00 0.00 |
| HETATM                     | 9        | C6A       | UNK       | 0     | 1     | 2.812    | 5.966  | 7.651  | 1.00 0.00 |
| HETATM                     | 10       | H6A       | UNK       | 0     | 1     | 2.148    | 6.336  | 7.117  | 1.00 0.00 |
| HETATM                     | 11       | C7A       | UNK       | 0     | 1     | 2.700    | 6.056  | 9.006  | 1.00 0.00 |
| HETATM                     | 12       | H7A       | UNK       | 0     | 1     | 1.957    | 6.432  | 9.420  | 1.00 0.00 |
| HETATM                     | 13       | C8A       | UNK       | 0     | 1     | 3.758    | 5.554  | 9.713  | 1.00 0.00 |
| HETATM                     | 14       | H8A       | UNK       | 0     | 1     | 3.766    | 5.701  | 10.632 | 1.00 0.00 |
| HETATM                     | 15       | C9A       | UNK       | 0     | 1     | 4.759    | 4.883  | 9.199  | 1.00 0.00 |
| HETATM                     | 16       | H9A       | UNK       | 0     | 1     | 5.379    | 4.468  | 9.756  | 1.00 0.00 |
| HETATM                     | 17       | C10A      | UNK       | 0     | 1     | 7.350    | 5.165  | 7.397  | 1.00 0.00 |
| HETATM                     | 18       | C11A      | UNK       | 0     | 1     | 7.326    | 6.379  | 6.743  | 1.00 0.00 |
| HETATM                     | 19       | H11A      | UNK       | 0     | 1     | 6.598    | 6.606  | 6.210  | 1.00 0.00 |
| HETATM                     | 20       | C12A      | UNK       | 0     | 1     | 8.376    | 7.249  | 6.879  | 1.00 0.00 |
| HETATM                     | 21       | H12A      | UNK       | 0     | 1     | 8.360    | 8.071  | 6.443  | 1.00 0.00 |
| HETATM                     | 22       | C13A      | UNK       | 0     | 1     | 9.446    | 6.909  | 7.658  | 1.00 0.00 |
| HETATM                     | 23       | H13A      | UNK       | 0     | 1     | 10.193   | 7.463  | 7.708  | 1.00 0.00 |
| HETATM                     | 24       | C14A      | UNK       | 0     | 1     | 9.396    | 5.719  | 8.374  | 1.00 0.00 |
| HETATM                     | 25       | H14A      | UNK       | 0     | 1     | 10.083   | 5.508  | 8.963  | 1.00 0.00 |
| HETATM                     | 26       | C15A      | UNK       | 0     | 1     | 8.356    | 4.867  | 8.224  | 1.00 0.00 |
| HETATM                     | 27       | H15A      | UNK       | 0     | 1     | 8.342    | 4.068  | 8.701  | 1.00 0.00 |
| HETATM                     | 28       | O1A       | UNK       | 0     | 1     | 7.088    | -1.880 | 10.876 | 1.00 0.00 |
| HETATM                     | 29       | H10A      | UNK       | 0     | 1     | 7.776    | -1.460 | 11.024 | 1.00 0.00 |
| HETATM                     | 30       | C1A       | UNK       | 0     | 1     | 6.608    | 0.463  | 8.523  | 1.00 0.00 |
| HETATM                     | 31       | C2A       | UNK       | 0     | 1     | 6.737    | -0.659 | 8.923  | 1.00 0.00 |
| HETATM                     | 32       | C3A       | UNK       | 0     | 1     | 6.909    | -2.007 | 9.503  | 1.00 0.00 |
| HETATM                     | 33       | C4A       | UNK       | 0     | 1     | 8.220    | -2.558 | 8.843  | 1.00 0.00 |
| HETATM                     | 34       | C5A       | UNK       | 0     | 1     | 9.243    | -3.113 | 9.583  | 1.00 0.00 |
| HETATM                     | 35       | H5A       | UNK       | 0     | 1     | 9.208    | -3.064 | 10.512 | 1.00 0.00 |
| HETATM                     | 36       | C6A       | UNK       | 0     | 1     | 10.301   | -3.729 | 8.989  | 1.00 0.00 |
| HETATM                     | 37       | H6A       | UNK       | 0     | 1     | 10.966   | -4.099 | 9.523  | 1.00 0.00 |
| HETATM                     | 38       | C7A       | UNK       | 0     | 1     | 10.414   | -3.819 | 7.635  | 1.00 0.00 |
| HETATM                     | 39       | H7A       | UNK       | 0     | 1     | 11.156   | -4.196 | 7.220  | 1.00 0.00 |
| HETATM                     | 40       | C8A       | UNK       | 0     | 1     | 9.356    | -3.318 | 6.927  | 1.00 0.00 |
| HETATM                     | 41       | H8A       | UNK       | 0     | 1     | 9.348    | -3.464 | 6.009  | 1.00 0.00 |
| HETATM                     | 42       | C9A       | UNK       | 0     | 1     | 8.354    | -2.647 | 7.442  | 1.00 0.00 |
| HETATM                     | 43       | H9A       | UNK       | 0     | 1     | 7.734    | -2.232 | 6.884  | 1.00 0.00 |
| HETATM                     | 44       | C10A      | UNK       | 0     | 1     | 5.763    | -2.928 | 9.244  | 1.00 0.00 |
| HETATM                     | 45       | C11A      | UNK       | 0     | 1     | 5.787    | -4.142 | 9.898  | 1.00 0.00 |
| HETATM                     | 46       | H11A      | UNK       | 0     | 1     | 6.515    | -4.369 | 10.430 | 1.00 0.00 |
| HETATM                     | 47       | C12A      | UNK       | 0     | 1     | 4.738    | -5.013 | 9.761  | 1.00 0.00 |
| HETATM                     | 48       | H12A      | UNK       | 0     | 1     | 4.753    | -5.834 | 10.197 | 1.00 0.00 |
| HETATM                     | 49       | C13A      | UNK       | 0     | 1     | 3.668    | -4.673 | 8.983  | 1.00 0.00 |
| HETATM                     | 50       | H13A      | UNK       | 0     | 1     | 2.921    | -5.227 | 8.933  | 1.00 0.00 |
| HETATM                     | 51       | C14A      | UNK       | 0     | 1     | 3.718    | -3.483 | 8.267  | 1.00 0.00 |
| HETATM                     | 52       | H14A      | UNK       | 0     | 1     | 3.030    | -3.271 | 7.678  | 1.00 0.00 |
| HETATM                     | 53       | C15A      | UNK       | 0     | 1     | 4.757    | -2.630 | 8.417  | 1.00 0.00 |
| HETATM                     | 54       | H15A      | UNK       | 0     | 1     | 4.771    | -1.832 | 7.939  | 1.00 0.00 |
| HETATM                     | 55       | O2A       | UNK       | 0     | 1     | 10.299   | 2.957  | 10.324 | 1.00 0.00 |
| HETATM                     | 56       | N1A       | UNK       | 0     | 1     | 10.774   | 0.858  | 9.871  | 1.00 0.00 |
| HETATM                     | 57       | H1NA      | UNK       | 0     | 1     | 9.933    | 0.186  | 10.500 | 1.00 0.00 |
| HETATM                     | 58       | C16A      | UNK       | 0     | 1     | 11.023   | 2.142  | 9.773  | 1.00 0.00 |
| HETATM                     | 59       | C17A      | UNK       | 0     | 1     | 12.286   | 2.459  | 8.964  | 1.00 0.00 |
| HETATM                     | 60       | H17A      | UNK       | 0     | 1     | 12.596   | 3.360  | 9.189  | 1.00 0.00 |

|        |     |      |     |   |   |        |        |        |      |      |
|--------|-----|------|-----|---|---|--------|--------|--------|------|------|
| HETATM | 61  | C18A | UNK | 0 | 1 | 13.295 | 1.465  | 9.397  | 1.00 | 0.00 |
| HETATM | 62  | H18A | UNK | 0 | 1 | 14.140 | 1.772  | 9.637  | 1.00 | 0.00 |
| HETATM | 63  | C19A | UNK | 0 | 1 | 13.066 | 0.210  | 9.457  | 1.00 | 0.00 |
| HETATM | 64  | H19A | UNK | 0 | 1 | 13.728 | -0.413 | 9.657  | 1.00 | 0.00 |
| HETATM | 65  | C20A | UNK | 0 | 1 | 11.681 | -0.167 | 9.187  | 1.00 | 0.00 |
| HETATM | 66  | H20A | UNK | 0 | 1 | 11.513 | -1.049 | 9.583  | 1.00 | 0.00 |
| HETATM | 67  | O2A  | UNK | 0 | 1 | 13.292 | -0.721 | 6.317  | 1.00 | 0.00 |
| HETATM | 68  | N1A  | UNK | 0 | 1 | 12.816 | 1.379  | 6.769  | 1.00 | 0.00 |
| HETATM | 69  | H1NA | UNK | 0 | 1 | 13.657 | 2.050  | 6.140  | 1.00 | 0.00 |
| HETATM | 70  | C16A | UNK | 0 | 1 | 12.568 | 0.095  | 6.868  | 1.00 | 0.00 |
| HETATM | 71  | C17A | UNK | 0 | 1 | 11.305 | -0.223 | 7.676  | 1.00 | 0.00 |
| HETATM | 72  | H17A | UNK | 0 | 1 | 10.994 | -1.124 | 7.452  | 1.00 | 0.00 |
| HETATM | 73  | C18A | UNK | 0 | 1 | 10.296 | 0.771  | 7.244  | 1.00 | 0.00 |
| HETATM | 74  | H18A | UNK | 0 | 1 | 9.451  | 0.465  | 7.004  | 1.00 | 0.00 |
| HETATM | 75  | C19A | UNK | 0 | 1 | 10.524 | 2.027  | 7.184  | 1.00 | 0.00 |
| HETATM | 76  | H19A | UNK | 0 | 1 | 9.862  | 2.650  | 6.984  | 1.00 | 0.00 |
| HETATM | 77  | C20A | UNK | 0 | 1 | 11.909 | 2.404  | 7.453  | 1.00 | 0.00 |
| HETATM | 78  | H20A | UNK | 0 | 1 | 12.077 | 3.285  | 7.057  | 1.00 | 0.00 |
| HETATM | 79  | O1B  | UNK | 0 | 1 | 2.535  | 16.138 | 0.256  | 1.00 | 0.00 |
| HETATM | 80  | H10B | UNK | 0 | 1 | 3.157  | 16.419 | -0.198 | 1.00 | 0.00 |
| HETATM | 81  | C1B  | UNK | 0 | 1 | 3.206  | 14.003 | 2.674  | 1.00 | 0.00 |
| HETATM | 82  | C2B  | UNK | 0 | 1 | 3.087  | 15.087 | 2.236  | 1.00 | 0.00 |
| HETATM | 83  | C3B  | UNK | 0 | 1 | 2.822  | 16.335 | 1.627  | 1.00 | 0.00 |
| HETATM | 84  | C4B  | UNK | 0 | 1 | 1.603  | 17.027 | 2.266  | 1.00 | 0.00 |
| HETATM | 85  | C5B  | UNK | 0 | 1 | 0.700  | 17.647 | 1.473  | 1.00 | 0.00 |
| HETATM | 86  | H5B  | UNK | 0 | 1 | 0.809  | 17.681 | 0.551  | 1.00 | 0.00 |
| HETATM | 87  | C6B  | UNK | 0 | 1 | -0.427 | 18.250 | 2.108  | 1.00 | 0.00 |
| HETATM | 88  | H6B  | UNK | 0 | 1 | -1.100 | 18.620 | 1.584  | 1.00 | 0.00 |
| HETATM | 89  | C7B  | UNK | 0 | 1 | -0.536 | 18.291 | 3.410  | 1.00 | 0.00 |
| HETATM | 90  | H7B  | UNK | 0 | 1 | -1.271 | 18.708 | 3.797  | 1.00 | 0.00 |
| HETATM | 91  | C8B  | UNK | 0 | 1 | 0.424  | 17.726 | 4.208  | 1.00 | 0.00 |
| HETATM | 92  | H8B  | UNK | 0 | 1 | 0.371  | 17.809 | 5.134  | 1.00 | 0.00 |
| HETATM | 93  | C9B  | UNK | 0 | 1 | 1.476  | 17.026 | 3.628  | 1.00 | 0.00 |
| HETATM | 94  | H9B  | UNK | 0 | 1 | 2.086  | 16.566 | 4.158  | 1.00 | 0.00 |
| HETATM | 95  | C10B | UNK | 0 | 1 | 4.006  | 17.338 | 1.759  | 1.00 | 0.00 |
| HETATM | 96  | C11B | UNK | 0 | 1 | 4.071  | 18.395 | 0.909  | 1.00 | 0.00 |
| HETATM | 97  | H11B | UNK | 0 | 1 | 3.437  | 18.510 | 0.235  | 1.00 | 0.00 |
| HETATM | 98  | C12B | UNK | 0 | 1 | 5.103  | 19.291 | 1.078  | 1.00 | 0.00 |
| HETATM | 99  | H12B | UNK | 0 | 1 | 5.126  | 20.056 | 0.551  | 1.00 | 0.00 |
| HETATM | 100 | C13B | UNK | 0 | 1 | 6.129  | 19.097 | 2.014  | 1.00 | 0.00 |
| HETATM | 101 | H13B | UNK | 0 | 1 | 6.870  | 19.653 | 2.097  | 1.00 | 0.00 |
| HETATM | 102 | C14B | UNK | 0 | 1 | 5.906  | 17.969 | 2.807  | 1.00 | 0.00 |
| HETATM | 103 | H14B | UNK | 0 | 1 | 6.511  | 17.816 | 3.498  | 1.00 | 0.00 |
| HETATM | 104 | C15B | UNK | 0 | 1 | 4.921  | 17.099 | 2.676  | 1.00 | 0.00 |
| HETATM | 105 | H15B | UNK | 0 | 1 | 4.876  | 16.342 | 3.213  | 1.00 | 0.00 |
| HETATM | 106 | O1C  | UNK | 0 | 1 | 3.946  | 10.202 | 5.362  | 1.00 | 0.00 |
| HETATM | 107 | H10C | UNK | 0 | 1 | 3.705  | 10.921 | 5.674  | 1.00 | 0.00 |
| HETATM | 108 | C1C  | UNK | 0 | 1 | 3.329  | 12.708 | 3.132  | 1.00 | 0.00 |
| HETATM | 109 | C2C  | UNK | 0 | 1 | 3.485  | 11.588 | 3.468  | 1.00 | 0.00 |
| HETATM | 110 | C3C  | UNK | 0 | 1 | 3.721  | 10.198 | 3.959  | 1.00 | 0.00 |
| HETATM | 111 | C4C  | UNK | 0 | 1 | 4.963  | 9.599  | 3.212  | 1.00 | 0.00 |
| HETATM | 112 | C5C  | UNK | 0 | 1 | 5.980  | 9.038  | 3.929  | 1.00 | 0.00 |
| HETATM | 113 | H5C  | UNK | 0 | 1 | 5.938  | 9.024  | 4.859  | 1.00 | 0.00 |
| HETATM | 114 | C6C  | UNK | 0 | 1 | 7.029  | 8.509  | 3.310  | 1.00 | 0.00 |
| HETATM | 115 | H6C  | UNK | 0 | 1 | 7.693  | 8.099  | 3.817  | 1.00 | 0.00 |
| HETATM | 116 | C7C  | UNK | 0 | 1 | 7.166  | 8.550  | 1.925  | 1.00 | 0.00 |
| HETATM | 117 | H7C  | UNK | 0 | 1 | 7.910  | 8.187  | 1.503  | 1.00 | 0.00 |
| HETATM | 118 | C8C  | UNK | 0 | 1 | 6.146  | 9.153  | 1.203  | 1.00 | 0.00 |
| HETATM | 119 | H8C  | UNK | 0 | 1 | 6.231  | 9.245  | 0.281  | 1.00 | 0.00 |
| HETATM | 120 | C9C  | UNK | 0 | 1 | 4.987  | 9.634  | 1.865  | 1.00 | 0.00 |
| HETATM | 121 | H9C  | UNK | 0 | 1 | 4.259  | 9.961  | 1.383  | 1.00 | 0.00 |
| HETATM | 122 | C10C | UNK | 0 | 1 | 2.538  | 9.295  | 3.711  | 1.00 | 0.00 |
| HETATM | 123 | C11C | UNK | 0 | 1 | 2.535  | 8.049  | 4.242  | 1.00 | 0.00 |
| HETATM | 124 | H11C | UNK | 0 | 1 | 3.287  | 7.762  | 4.709  | 1.00 | 0.00 |
| HETATM | 125 | C12C | UNK | 0 | 1 | 1.489  | 7.205  | 4.120  | 1.00 | 0.00 |

|        |     |      |     |   |   |        |        |        |      |      |
|--------|-----|------|-----|---|---|--------|--------|--------|------|------|
| HETATM | 126 | H12C | UNK | 0 | 1 | 1.490  | 6.381  | 4.553  | 1.00 | 0.00 |
| HETATM | 127 | C13C | UNK | 0 | 1 | 0.426  | 7.584  | 3.345  | 1.00 | 0.00 |
| HETATM | 128 | H13C | UNK | 0 | 1 | -0.285 | 6.999  | 3.205  | 1.00 | 0.00 |
| HETATM | 129 | C14C | UNK | 0 | 1 | 0.414  | 8.789  | 2.794  | 1.00 | 0.00 |
| HETATM | 130 | H14C | UNK | 0 | 1 | -0.306 | 9.023  | 2.253  | 1.00 | 0.00 |
| HETATM | 131 | C15C | UNK | 0 | 1 | 1.401  | 9.693  | 2.980  | 1.00 | 0.00 |
| HETATM | 132 | H15C | UNK | 0 | 1 | 1.331  | 10.555 | 2.636  | 1.00 | 0.00 |
| HETATM | 133 | O2B  | UNK | 0 | 1 | 8.388  | 0.326  | 11.602 | 1.00 | 0.00 |
| HETATM | 134 | N1B  | UNK | 0 | 1 | 7.947  | 2.400  | 12.178 | 1.00 | 0.00 |
| HETATM | 135 | H1NB | UNK | 0 | 1 | 8.336  | 2.979  | 11.665 | 1.00 | 0.00 |
| HETATM | 136 | C16B | UNK | 0 | 1 | 7.630  | 1.131  | 12.178 | 1.00 | 0.00 |
| HETATM | 137 | C17B | UNK | 0 | 1 | 6.243  | 0.877  | 12.862 | 1.00 | 0.00 |
| HETATM | 138 | H17B | UNK | 0 | 1 | 5.906  | -0.001 | 12.582 | 1.00 | 0.00 |
| HETATM | 139 | C18B | UNK | 0 | 1 | 5.350  | 1.824  | 12.477 | 1.00 | 0.00 |
| HETATM | 140 | H18B | UNK | 0 | 1 | 4.471  | 1.571  | 12.304 | 1.00 | 0.00 |
| HETATM | 141 | C19B | UNK | 0 | 1 | 5.668  | 3.083  | 12.339 | 1.00 | 0.00 |
| HETATM | 142 | H19B | UNK | 0 | 1 | 5.094  | 3.704  | 11.956 | 1.00 | 0.00 |
| HETATM | 143 | C20B | UNK | 0 | 1 | 6.933  | 3.408  | 12.812 | 1.00 | 0.00 |
| HETATM | 144 | H20B | UNK | 0 | 1 | 7.153  | 4.303  | 12.477 | 1.00 | 0.00 |
| HETATM | 145 | O2C  | UNK | 0 | 1 | 5.235  | 3.947  | 15.577 | 1.00 | 0.00 |
| HETATM | 146 | N1C  | UNK | 0 | 1 | 5.562  | 1.794  | 15.018 | 1.00 | 0.00 |
| HETATM | 147 | H1NC | UNK | 0 | 1 | 4.753  | 1.761  | 15.775 | 1.00 | 0.00 |
| HETATM | 148 | C16C | UNK | 0 | 1 | 5.958  | 3.052  | 15.051 | 1.00 | 0.00 |
| HETATM | 149 | C17C | UNK | 0 | 1 | 7.272  | 3.377  | 14.377 | 1.00 | 0.00 |
| HETATM | 150 | H17C | UNK | 0 | 1 | 7.605  | 4.248  | 14.675 | 1.00 | 0.00 |
| HETATM | 151 | C18C | UNK | 0 | 1 | 8.222  | 2.313  | 14.735 | 1.00 | 0.00 |
| HETATM | 152 | H18C | UNK | 0 | 1 | 9.116  | 2.508  | 14.897 | 1.00 | 0.00 |
| HETATM | 153 | C19C | UNK | 0 | 1 | 7.789  | 1.057  | 14.827 | 1.00 | 0.00 |
| HETATM | 154 | H19C | UNK | 0 | 1 | 8.323  | 0.366  | 15.146 | 1.00 | 0.00 |
| HETATM | 155 | C20C | UNK | 0 | 1 | 6.487  | 0.852  | 14.414 | 1.00 | 0.00 |
| HETATM | 156 | H20C | UNK | 0 | 1 | 6.229  | -0.039 | 14.729 | 1.00 | 0.00 |
| HETATM | 157 | O1W  | UNK | 0 | 1 | 3.613  | 1.289  | 16.725 | 0.34 | 0.00 |

|         |    |    |    |
|---------|----|----|----|
| CONNECT | 1  | 2  | 5  |
| CONNECT | 2  |    |    |
| CONNECT | 3  | 4  | 30 |
| CONNECT | 4  | 5  |    |
| CONNECT | 5  | 6  | 17 |
| CONNECT | 6  | 7  | 15 |
| CONNECT | 7  | 8  | 9  |
| CONNECT | 8  |    |    |
| CONNECT | 9  | 10 | 11 |
| CONNECT | 10 |    |    |
| CONNECT | 11 | 12 | 13 |
| CONNECT | 12 |    |    |
| CONNECT | 13 | 14 | 15 |
| CONNECT | 14 |    |    |
| CONNECT | 15 | 16 |    |
| CONNECT | 16 |    |    |
| CONNECT | 17 | 18 | 26 |
| CONNECT | 18 | 19 | 20 |
| CONNECT | 19 |    |    |
| CONNECT | 20 | 21 | 22 |
| CONNECT | 21 |    |    |
| CONNECT | 22 | 23 | 24 |
| CONNECT | 23 |    |    |
| CONNECT | 24 | 25 | 26 |
| CONNECT | 25 |    |    |
| CONNECT | 26 | 27 |    |
| CONNECT | 27 |    |    |
| CONNECT | 28 | 29 | 32 |
| CONNECT | 29 |    |    |
| CONNECT | 30 | 31 |    |
| CONNECT | 31 | 32 |    |
| CONNECT | 32 | 33 | 44 |
| CONNECT | 33 | 34 | 42 |

|         |    |    |     |    |
|---------|----|----|-----|----|
| CONNECT | 34 | 35 | 36  |    |
| CONNECT | 35 |    |     |    |
| CONNECT | 36 | 37 | 38  |    |
| CONNECT | 37 |    |     |    |
| CONNECT | 38 | 39 | 40  |    |
| CONNECT | 39 |    |     |    |
| CONNECT | 40 | 41 | 42  |    |
| CONNECT | 41 |    |     |    |
| CONNECT | 42 | 43 |     |    |
| CONNECT | 43 |    |     |    |
| CONNECT | 44 | 45 | 53  |    |
| CONNECT | 45 | 46 | 47  |    |
| CONNECT | 46 |    |     |    |
| CONNECT | 47 | 48 | 49  |    |
| CONNECT | 48 |    |     |    |
| CONNECT | 49 | 50 | 51  |    |
| CONNECT | 50 |    |     |    |
| CONNECT | 51 | 52 | 53  |    |
| CONNECT | 52 |    |     |    |
| CONNECT | 53 | 54 |     |    |
| CONNECT | 54 |    |     |    |
| CONNECT | 55 | 58 |     |    |
| CONNECT | 56 | 57 | 58  | 65 |
| CONNECT | 57 |    |     |    |
| CONNECT | 58 | 59 |     |    |
| CONNECT | 59 | 60 | 61  | 77 |
| CONNECT | 60 |    |     |    |
| CONNECT | 61 | 62 | 63  |    |
| CONNECT | 62 |    |     |    |
| CONNECT | 63 | 64 | 65  |    |
| CONNECT | 64 |    |     |    |
| CONNECT | 65 | 66 | 71  |    |
| CONNECT | 66 |    |     |    |
| CONNECT | 67 | 70 |     |    |
| CONNECT | 68 | 69 | 70  | 77 |
| CONNECT | 69 |    |     |    |
| CONNECT | 70 | 71 |     |    |
| CONNECT | 71 | 72 | 73  |    |
| CONNECT | 72 |    |     |    |
| CONNECT | 73 | 74 | 75  |    |
| CONNECT | 74 |    |     |    |
| CONNECT | 75 | 76 | 77  |    |
| CONNECT | 76 |    |     |    |
| CONNECT | 77 | 78 |     |    |
| CONNECT | 78 |    |     |    |
| CONNECT | 79 | 80 | 83  |    |
| CONNECT | 80 |    |     |    |
| CONNECT | 81 | 82 | 108 |    |
| CONNECT | 82 | 83 |     |    |
| CONNECT | 83 | 84 | 95  |    |
| CONNECT | 84 | 85 | 93  |    |
| CONNECT | 85 | 86 | 87  |    |
| CONNECT | 86 |    |     |    |
| CONNECT | 87 | 88 | 89  |    |
| CONNECT | 88 |    |     |    |
| CONNECT | 89 | 90 | 91  |    |
| CONNECT | 90 |    |     |    |
| CONNECT | 91 | 92 | 93  |    |
| CONNECT | 92 |    |     |    |
| CONNECT | 93 | 94 |     |    |
| CONNECT | 94 |    |     |    |
| CONNECT | 95 | 96 | 104 |    |
| CONNECT | 96 | 97 | 98  |    |
| CONNECT | 97 |    |     |    |
| CONNECT | 98 | 99 | 100 |    |
